# Supplementary material for: Green fluorescent protein fused to peptide agonists of two dissimilar G protein-coupled receptors: novel ligands of the bradykinin B2 (rhodopsin family) receptor and parathyroid hormone PTH1 (secretin family) receptor
Source: PubMed Central journal article supplement (PMC4184569; doi:10.1002/prp2.4), 2013-10-04
Supplement: prp20001-e00004-sd1.pdf [file prp20001-e00004-sd1.pdf]

Charest-Morin et al.: Supporting Information

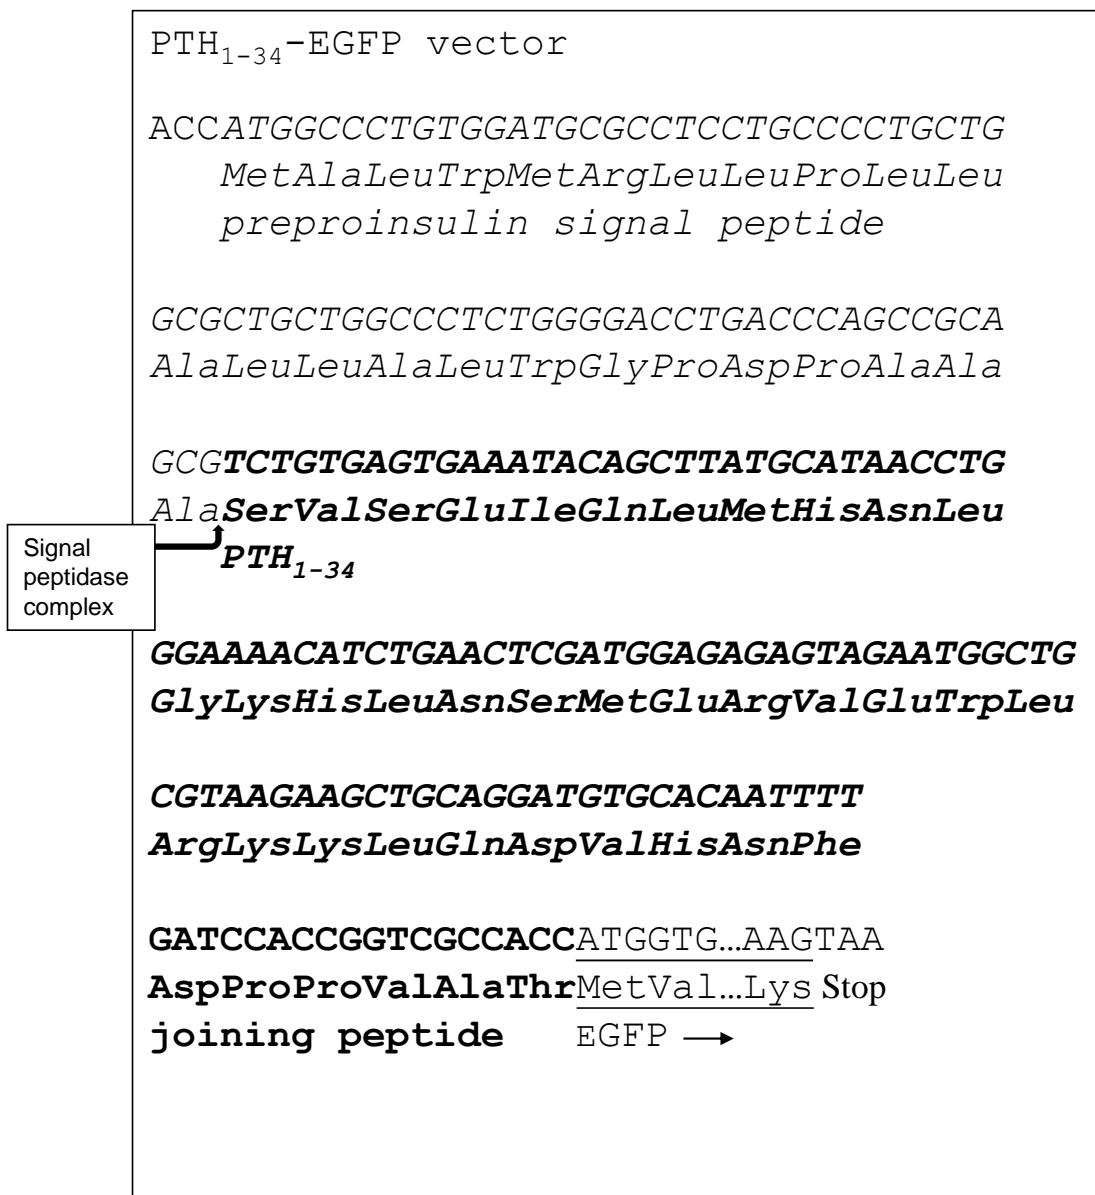

Supplementary Figure 1. Partial coding sequence of the PTH<sub>1-34</sub>-EGFP vector. See text for description.

s-EGFP-MK vector (in pcDNA3)

Boxed sequence removed in EGFP-MK vector

ACCATGGCCCTGTGGATGCGCCTCCTGCCCTGCTG  
*MetAlaLeuTrpMetArgLeuLeuProLeuLeu*  
*preproinsulin signal peptide*

GCGCTGCTGGCCCTCTGGGGACCTGACCCAGCCGCA  
*AlaLeuLeuAlaLeuTrpGlyProAspProAlaAla*

GCG**GATCCACCGGTCGCCACC**ATGGTG ... CTGTAC  
*Ala**AspProProValAlaThr**MetVal ... LeuTyr*  
*joining peptide* EGFP

Signal  
peptidase  
complex

AAG**GATTTGCCTAAGATCAACCGCAAAGGACCACGT**  
*Lys**AspLeuProLysIleAsnArgLysGlyProArg***  
*maximakinin*

CCACCGGGTTCCTCCCTTTTCGATAACTCGAGCATG  
*ProProGlyPheSerProPheArgStop*

BsrGI

XhoI

Supplementary Figure 2. Partial coding sequence of the s-EGFP-MK and the EGFP-MK vectors, the second being obtained following the deletion of the boxed sequence (signal peptide + joining peptide). See text for description.

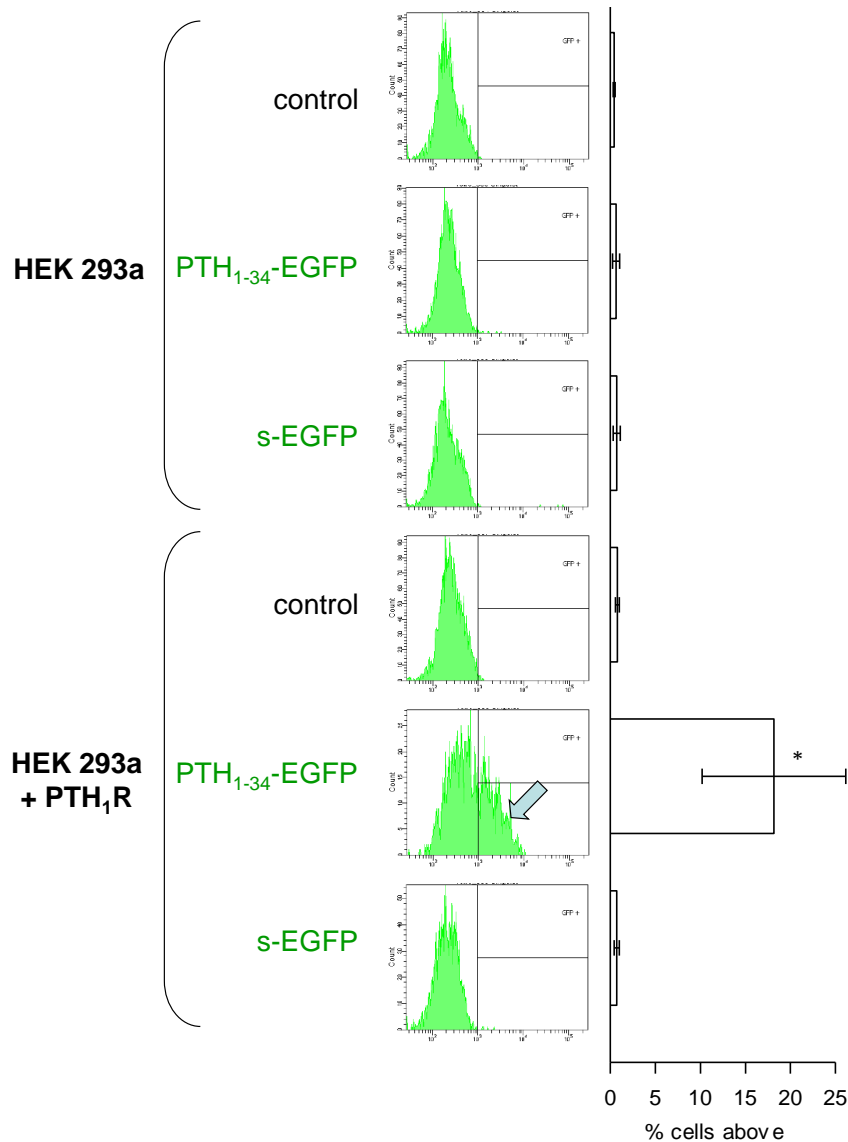

Supplementary Figure 3. Cytofluorometry of HEK 293a cells that optionally expressed PTH<sub>1</sub>R (3 conditions at bottom), sequentially detached and stained for 30 min (37°C) with the undiluted conditioned medium of other cells producing s-EGFP or PTH<sub>1-34</sub>-EGFP, as indicated. Left: distributions based on the counting of 10000 cells. A threshold of autofluorescence was defined using control cells with no fluorophore. It was surpassed only under one set of experimental conditions (arrow). Right: proportion of cells above the threshold under each experimental condition in 3 separate experiments (means  $\pm$  s.e.m.). ANOVA indicated that the values were heterogeneous ( $P < 0.02$ ). \*  $P < 0.05$  vs. controls with or without receptors (Tukey-Kramer multiple comparison test). s-EGFP did not significantly stain cells.

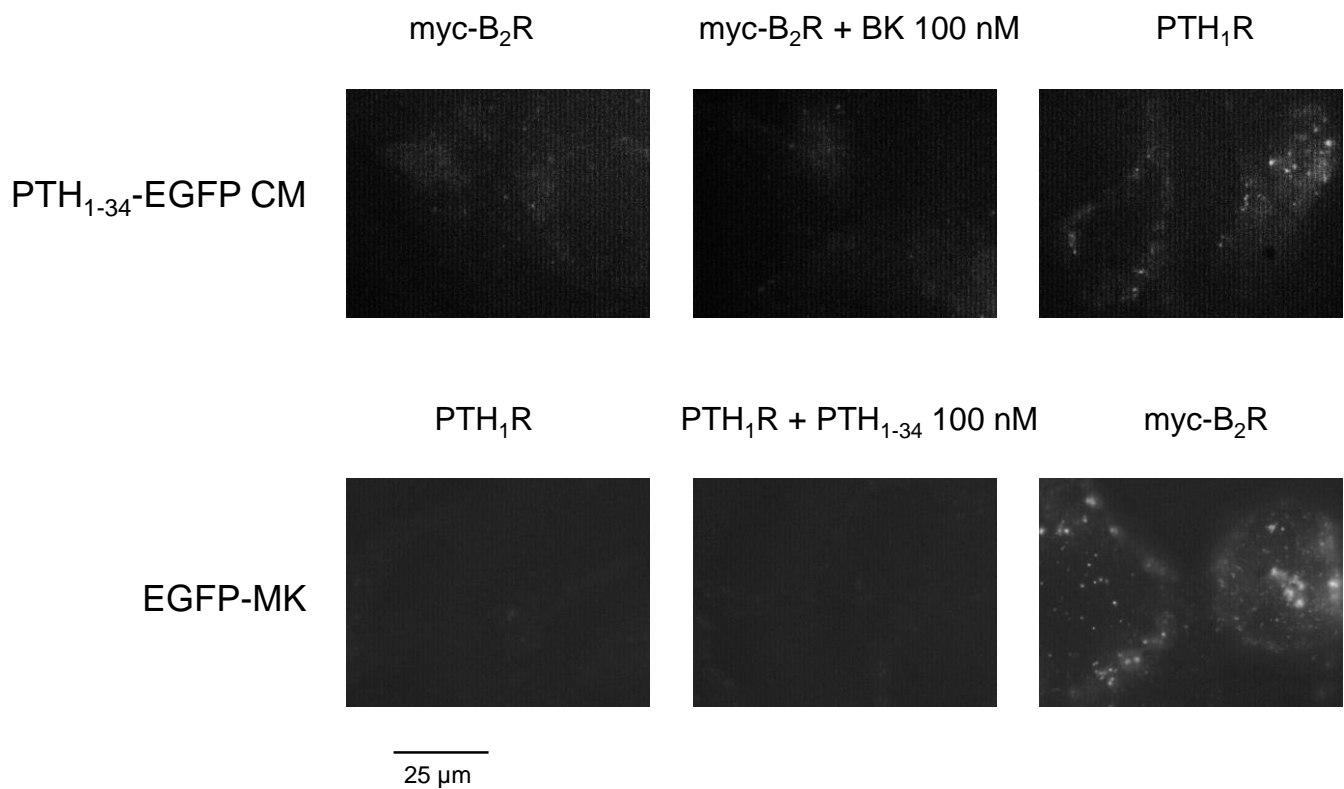

Supplementary Figure 4. Lack of stimulated uptake of fluorescent probes by cells expressing the non-corresponding receptor. HEK 293a cells expressing the indicated receptor were incubated for 30 min with one of the EGFP fusion protein and optionally stimulated with a non-fluorescent peptide, as indicated.
